# Supplementary material for: Sonochemical engineering of highly efficient and robust Au nanoparticle-wrapped on Fe/ZrO2 nanorods and their controllable product selectivity in dimethyl oxalate hydrogenation
Source: Royal Society of Chemistry journal article supplement (doi:10.1039/c9cy02469g), 2020-01-01
Supplement: c9cy02469g1.pdf [file c9cy02469g1.pdf]

## **Supplementary Information**

### **Sonochemical engineering of highly efficient and robust Au nanoparticles wrapped on Fe/ZrO<sub>2</sub> nanorods and their controllable products selectivity in dimethyl oxalate hydrogenation**

Mohamed Abbas <sup>a,b,\*</sup>, Juan Zhang <sup>b</sup> and Jiangang Chen <sup>b,\*</sup>

State Key Laboratory of Coal Conversion, Institute of Coal Chemistry, Chinese Academy of Sciences, Taiyuan, 030001, China.

Ceramics Department, National Research Centre, 12622 El Behouth Str., Cairo, Egypt.

University of Chinese Academy of Sciences, Beijing, China

E-mail: mohamed\_abbas83@yahoo.com, abbas@sxicc.ac.cn,

E-mail: chenjg@sxicc.ac.cn

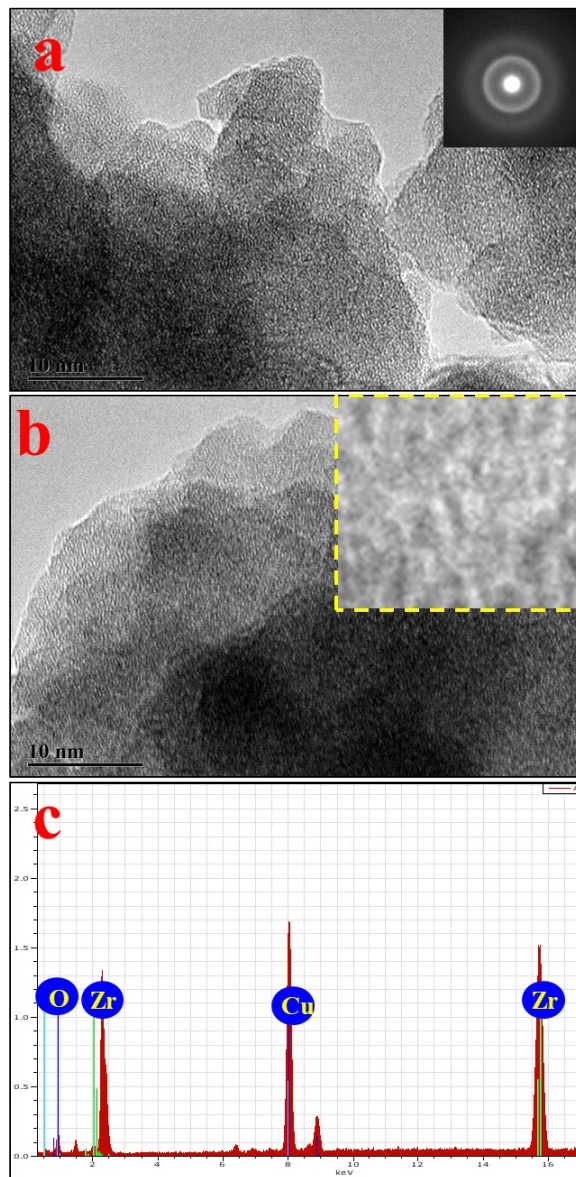

Fig. S1 TEM and HRTEM images of amorphous ZrO<sub>2</sub> (a, b) and EDS elemental analysis (C).

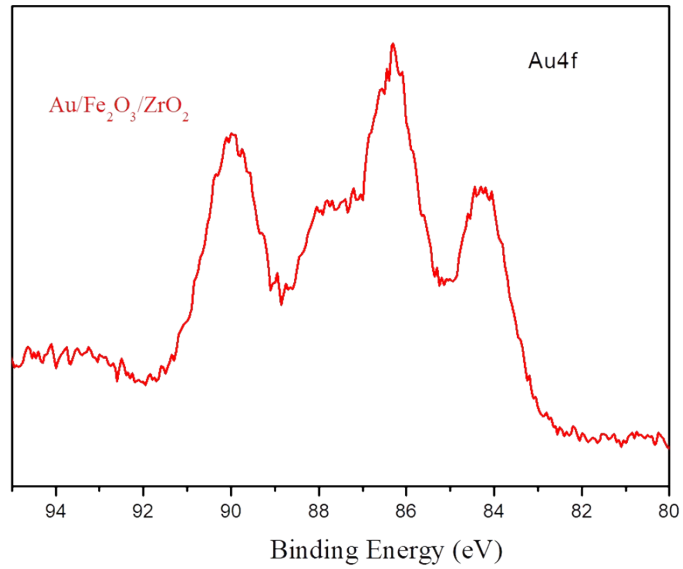

**Fig. S2** High resolution XPS spectrum for the Au 4f of Au coated Fe/ZrO<sub>2</sub> nanorods

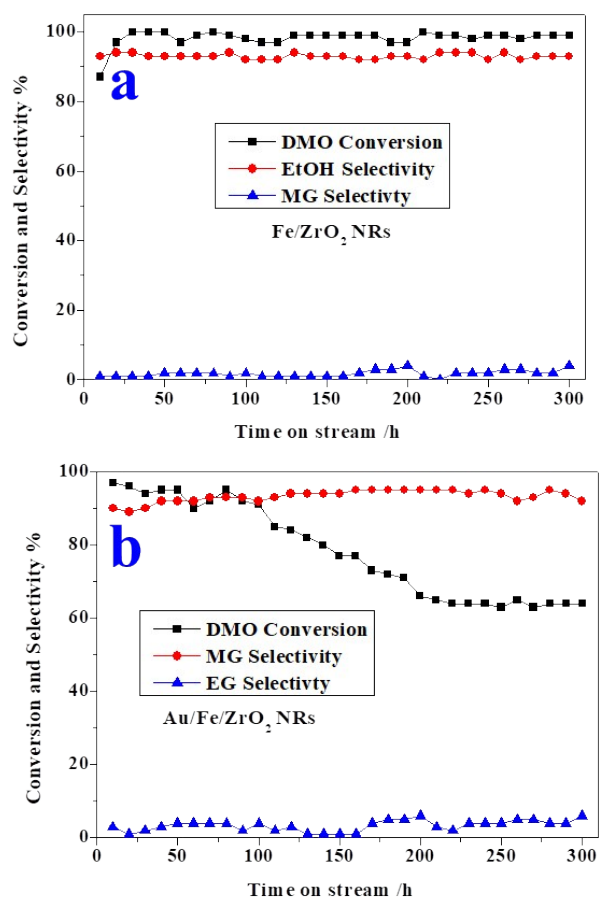

**Fig S3** MG, EtOH and DMO conversion ratio for (a) Fe/ZrO<sub>2</sub> catalyst and (b) Au/Fe/ZrO<sub>2</sub> NRs after 300 h

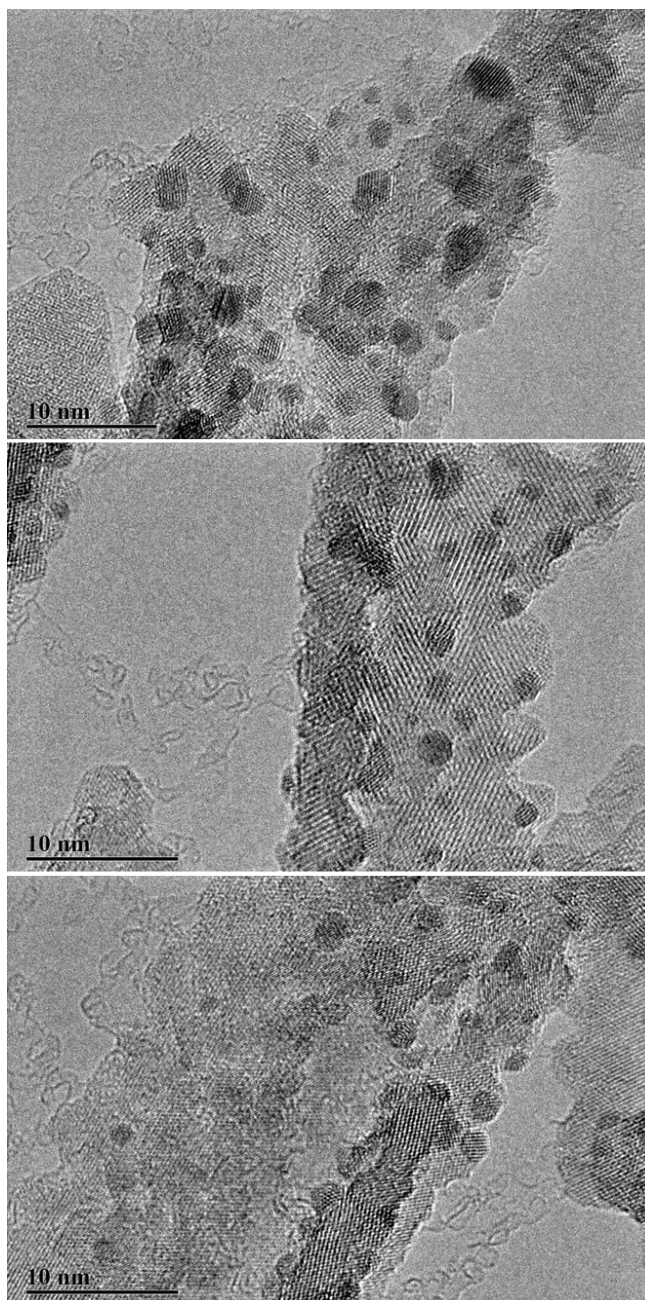

**Fig. S4** Various TEM images for the spent Au decorated Fe/ZrO<sub>2</sub> catalyst
